# Supplementary material
Source: PubMed Central journal article supplement (PMC3347242)
Supplement: supp_32.9.1633_MCB6373-11_SF1-SF2.pdf [file supp_32.9.1633_MCB6373-11_SF1-SF2.pdf]

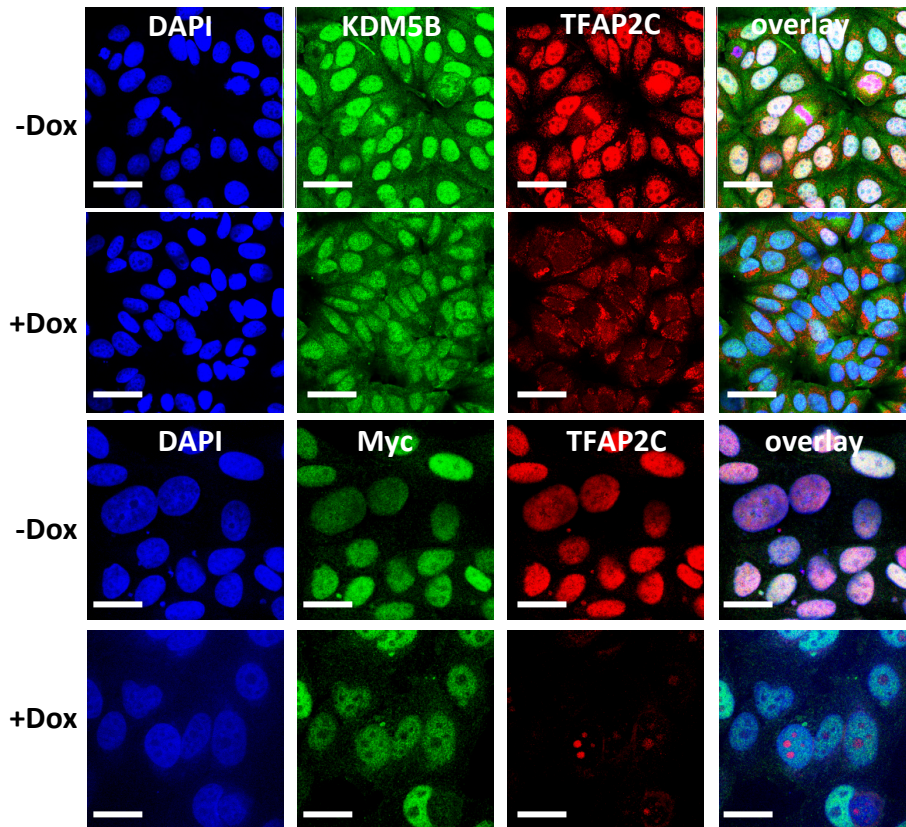

**Supplementary Fig. S1: Endogenous KDM5B, Myc and TFAP2C co-localise in the nuclear compartment of MCF-7 cells**

shTFAP2CMCF7 cells were grown on coverslips and incubated with or without doxycycline (Dox) for 72 hrs to silence TFAP2C. After fixation, cells were incubated with primary antibodies as indicated then incubated with immunofluorescently labeled secondary antibodies and DAPI and viewed by confocal microscopy; scale bar: 20 $\mu$ m.

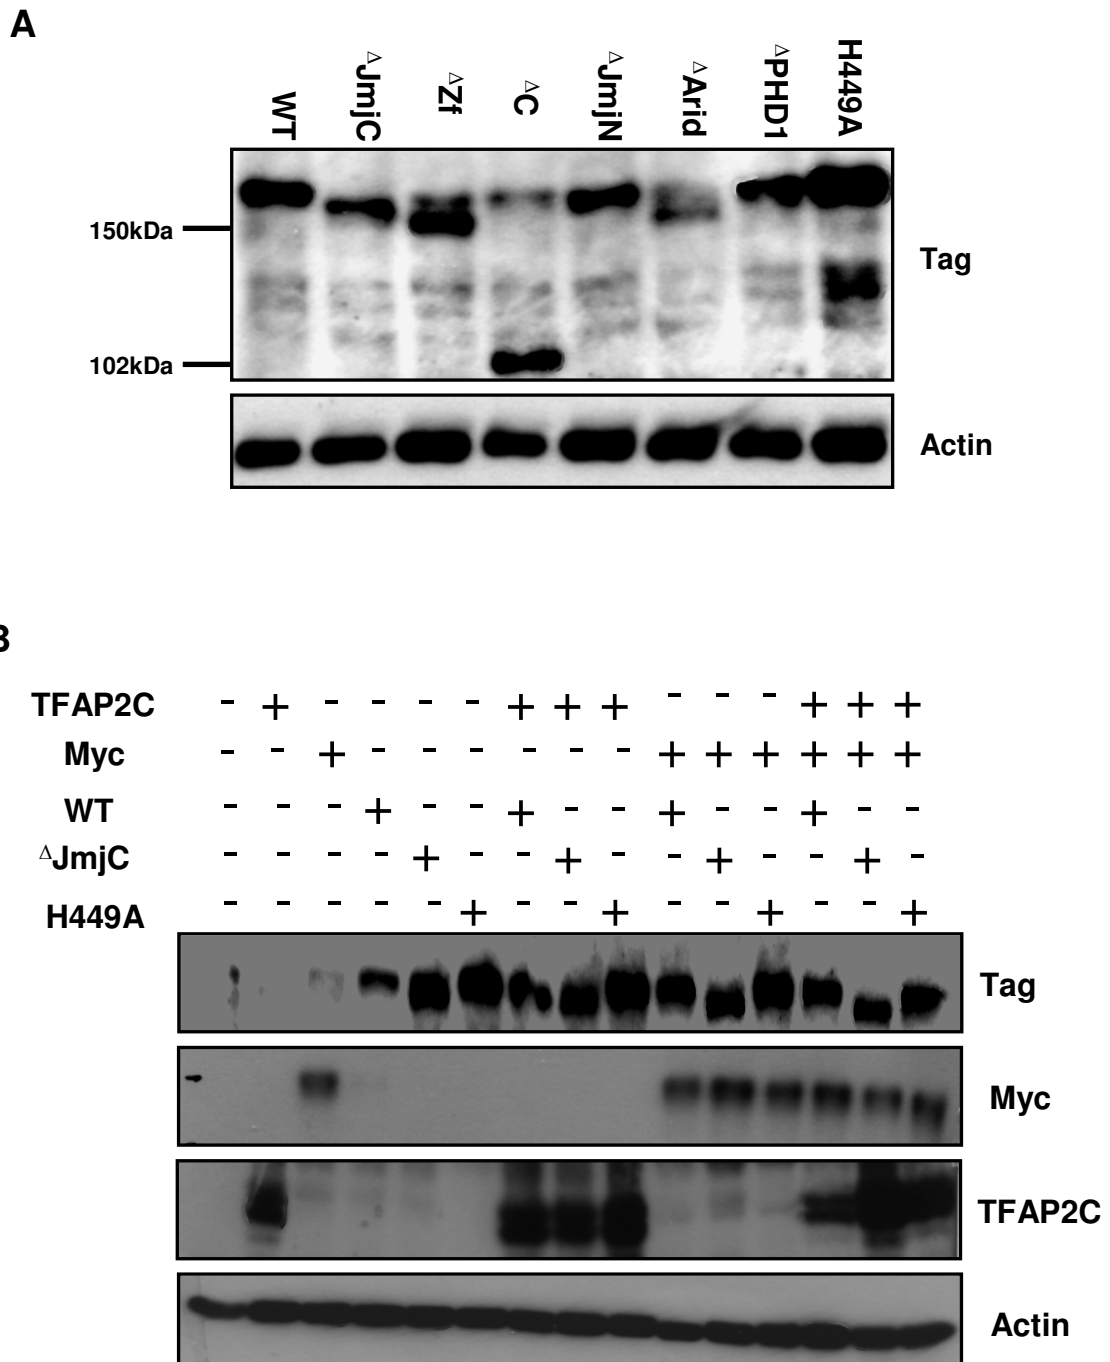

**Supplementary Fig. S2:** Control of expression constructs used in transfection experiments. **A)** Efficient expression of the KDM5B mutant series in HepG2 cells was verified by western blot. **B)** Verification of consistent expression of all proteins in multi-plasmid transfections shown in Fig. 4B.
